# Supplementary material for: Multiple intermolecular interactions in guest inclusion by acyclic host compounds
Source: Royal Society of Chemistry journal article supplement (doi:10.1039/d3ce00775h), 2023-01-01
Supplement: d3ce00775h1.pdf [file d3ce00775h1.pdf]

## Supplementary Information

### Multiple intermolecular interactions in guest inclusion by acyclic host compounds

Masatoshi Kawahata,<sup>a\*</sup> Haruka Yamamoto,<sup>b</sup> Masahide Tominaga<sup>b</sup> and Kentaro Yamaguchi<sup>\*b</sup>

<sup>a</sup> Showa Pharmaceutical University, Machida, Tokyo 194-8543, Japan

<sup>b</sup> Faculty of Pharmaceutical Sciences at Kagawa Campus, Tokushima Bunri University, Sanuki, Kagawa 769-2193, Japan

E-mail: kawahatam@ac.shoyaku.ac.jp and kyamaguchi@kph.bunri-u.ac.jp

#### Table of Contents

|                                                                               |    |
|-------------------------------------------------------------------------------|----|
| • <sup>1</sup> H and <sup>13</sup> C NMR spectra of <b>2</b>                  | S2 |
| • Single crystal X-ray diffraction experiment for crystal <b>1a</b> (Fig. S1) | S3 |
| • Single crystal X-ray diffraction experiment for crystal <b>1b</b> (Fig. S2) | S4 |
| • Single crystal X-ray diffraction experiment for crystal <b>1c</b> (Fig. S3) | S5 |
| • Single crystal X-ray diffraction experiment for crystal <b>1d</b> (Fig. S4) | S6 |
| • Single crystal X-ray diffraction experiment for crystal <b>2a</b> (Fig. S5) | S7 |
| • Single crystal X-ray diffraction experiment for crystal <b>3a</b> (Fig. S6) | S8 |
| • References                                                                  | S9 |

$^1\text{H}$  NMR spectrum of **2** (400 MHz,  $\text{CDCl}_3$ )

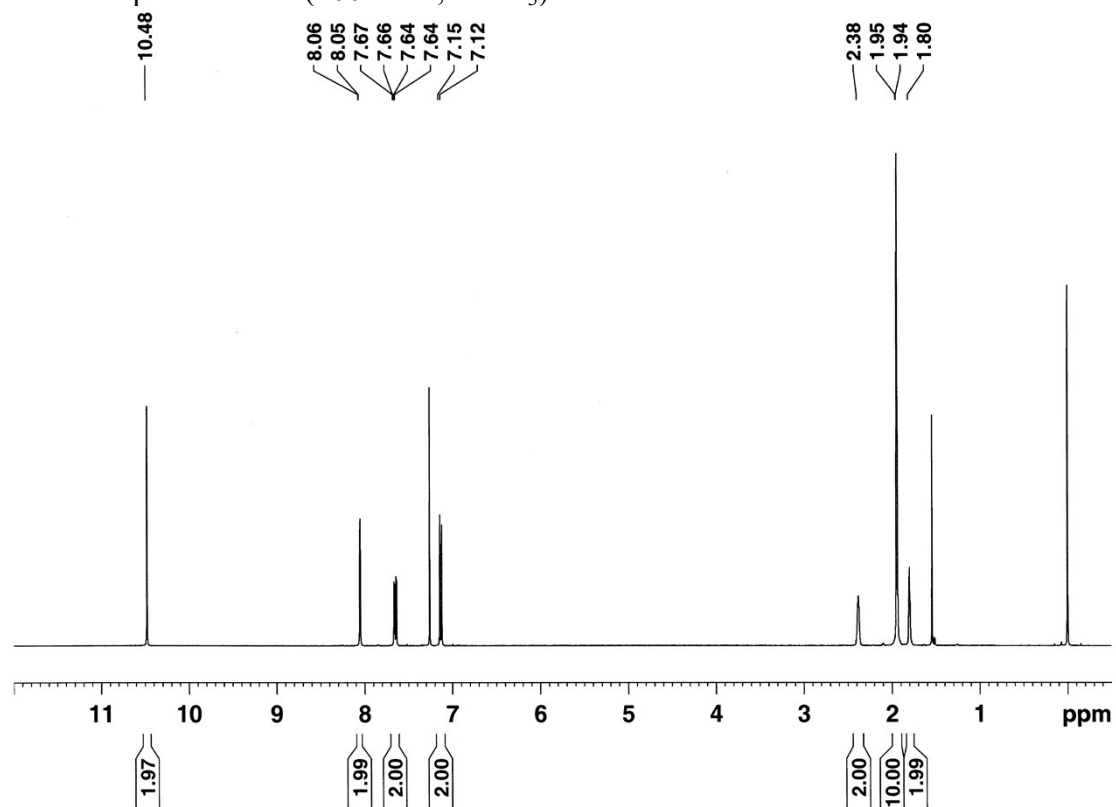

$^{13}\text{C}$  NMR spectrum of **2** (100 MHz,  $\text{CDCl}_3$ )

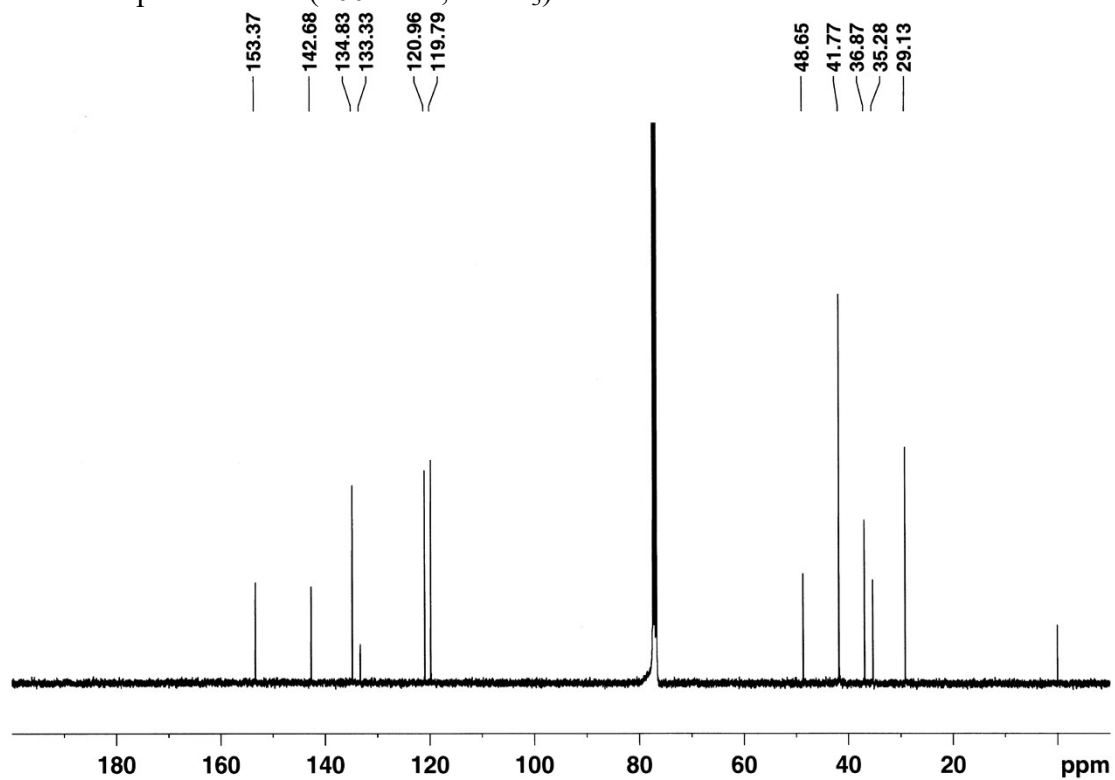

## General procedure of single crystal X-ray diffraction experiment

A single crystal was immersed in Paratone-N oil and placed in the N<sub>2</sub> cold stream at 100 K. Data were collected using diffractometer with PHOTON II 14 CPAD detector (Bruker D8 VENTURE, CuK $\alpha$ :  $\lambda = 1.54178 \text{ \AA}$ ). Absorption correction was performed by an empirical method implemented in SADABS.<sup>1</sup> Structure solution and refinement were performed by using SHELXT-2018/2<sup>2</sup> and SHELXL-2018/3<sup>3</sup>.

## Single crystal X-ray diffraction experiment for crystal 1a

The low diffracting yellow plate crystal ( $0.100 \times 0.100 \times 0.050 \text{ mm}^3$ ) was obtained from slow evaporation of an acetone solution of **1**.

C<sub>25</sub>H<sub>28</sub>N<sub>2</sub>O<sub>7</sub>,  $M_r = 468.49$ ; triclinic, space group *P*-1,  $Z = 2$ ,  $D_{\text{calc}} = 1.387 \text{ g}\cdot\text{cm}^{-3}$ ,  $a = 6.9004(7)$ ,  $b = 10.5029(11)$ ,  $c = 15.8453(17) \text{ \AA}$ ,  $\alpha = 95.066(4)$ ,  $\beta = 92.516(4)$ ,  $\gamma = 100.761(3)^\circ$ ,  $V = 1121.6(2) \text{ \AA}^3$ , 16169 observed and 3983 [ $I > 2\sigma(I)$ ], 4439 [all data] independent reflections, 315 parameters, final  $R_1 = 0.0375$ ,  $wR_2 = 0.1040$ ,  $S = 1.058$  [ $I > 2\sigma(I)$ ] and  $R_1 = 0.0414$ ,  $wR_2 = 0.1075$ ,  $S = 1.058$  [all data]. CCDC 2267699.

All non-hydrogen atoms were refined anisotropically. The O-H hydrogen atoms were assigned from the difference Fourier map and refined isotropically. Another hydrogen atoms were refined isotropically on the calculated positions using a riding model (AFIX 13, 137, 23 and 43) with  $U_{\text{iso}}$  values constrained to 1.2/1.5  $U_{\text{eq}}$  of their parent atoms.

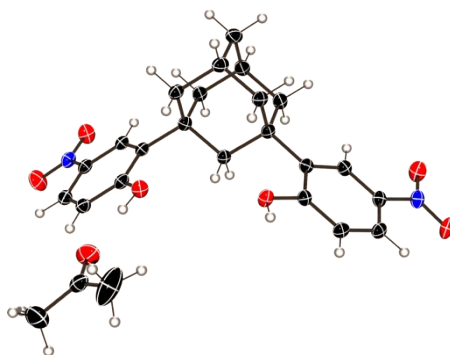

**Fig. S1** ORTEP drawing of **1** and acetone in crystal **1a** (asymmetric unit, 50% probability).

### Single crystal X-ray diffraction experiment for crystal **1b**

The low diffracting colorless prismatic crystal ( $0.150 \times 0.100 \times 0.100 \text{ mm}^3$ ) was obtained from vapor diffusion of hexane into a 2-butanone solution of **1**.

$\text{C}_{26}\text{H}_{30}\text{N}_2\text{O}_7$ ,  $M_r = 482.52$ ; triclinic, space group  $P-1$ ,  $Z = 2$ ,  $D_{\text{calc}} = 1.387 \text{ g}\cdot\text{cm}^{-3}$ ,  $a = 7.0766(14)$ ,  $b = 10.505(2)$ ,  $c = 15.939(3) \text{ \AA}$ ,  $\alpha = 95.513(6)$ ,  $\beta = 93.850(6)$ ,  $\gamma = 100.486(5)^\circ$ ,  $V = 1155.4(4) \text{ \AA}^3$ , 15824 observed and 4385 [ $I > 2\sigma(I)$ ], 4522 [all data] independent reflections, 372 parameters, 24 restraints, final  $R_1 = 0.0381$ ,  $wR_2 = 0.1028$ ,  $S = 1.057$  [ $I > 2\sigma(I)$ ] and  $R_1 = 0.0389$ ,  $wR_2 = 0.1040$ ,  $S = 1.058$  [all data]. CCDC 2267700.

All non-hydrogen atoms were refined anisotropically. The O-H hydrogen atoms were assigned from the difference Fourier map and refined isotropically. Another hydrogen atoms were refined isotropically on the calculated positions using a riding model (AFIX 13, 137, 23 and 43) with  $U_{\text{iso}}$  values constrained to 1.2/1.5  $U_{\text{eq}}$  of their parent atoms.

A pair of disordered 2-butanone molecules were refined with PART n and each free variable (21/-21). Occupancy ratio was 81/19. The minor 2-butanone molecule (C23B, C24B, C25B, C26B and O7B) was also applied to SIMU.

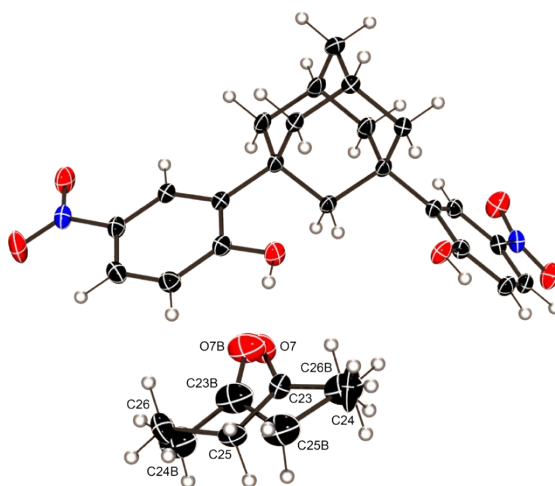

**Fig. S2** ORTEP drawing of **1** and 2-butanone in crystal **1b** (asymmetric unit, 50% probability).

### Single crystal X-ray diffraction experiment for **1c**

The low diffracting colorless prismatic crystal ( $0.120 \times 0.120 \times 0.100 \text{ mm}^3$ ) was obtained from vapor diffusion of hexane into a methyl acetate solution of **1**.

$\text{C}_{25}\text{H}_{28}\text{N}_2\text{O}_8$ ,  $M_r = 484.49$ ; triclinic, space group  $P-1$ ,  $Z = 2$ ,  $D_{\text{calc}} = 1.416 \text{ g}\cdot\text{cm}^{-3}$ ,  $a = 7.0715(10)$ ,  $b = 10.4603(14)$ ,  $c = 15.710(2) \text{ \AA}$ ,  $\alpha = 95.120(4)$ ,  $\beta = 94.102(5)$ ,  $\gamma = 99.743(4)^\circ$ ,  $V = 1136.3(3) \text{ \AA}^3$ , 14281 observed and 3956 [ $I > 2\sigma(I)$ ], 4426 [all data] independent reflections, 372 parameters, 24 restraints, final  $R_1 = 0.0462$ ,  $wR_2 = 0.1347$ ,  $S = 1.131$  [ $I > 2\sigma(I)$ ] and  $R_1 = 0.0501$ ,  $wR_2 = 0.1389$ ,  $S = 1.134$  [all data]. CCDC 2267701.

All non-hydrogen atoms were refined anisotropically. The O-H hydrogen atoms were assigned from the difference Fourier map and refined isotropically. Another hydrogen atoms were refined isotropically on the calculated positions using a riding model (AFIX 13, 137, 23 and 43) with  $U_{\text{iso}}$  values constrained to 1.2/1.5  $U_{\text{eq}}$  of their parent atoms.

A pair of disordered methyl acetate molecules were refined with PART n and each free variable (21/−21). Occupancy ratio was 70/30. The minor methyl acetate molecule (C23B, C24B, C25B, O7B and O8B) was also applied to SIMU.

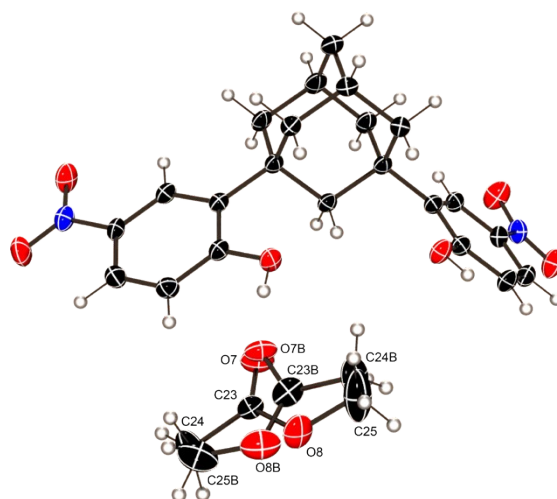

**Fig. S3** ORTEP drawing of **1** and methyl acetate in crystal **1c** (asymmetric unit, 50% probability).

### Single crystal X-ray diffraction experiment for **1d**

The colorless prismatic crystal ( $0.200 \times 0.200 \times 0.200 \text{ mm}^3$ ) was obtained from vapor diffusion of hexane into a bromoform solution of **1**.

$\text{C}_{22}\text{H}_{22}\text{N}_2\text{O}_6$ ,  $M_r = 410.41$ ; monoclinic, space group  $P2_1/n$ ,  $Z = 4$ ,  $D_{\text{calc}} = 1.463 \text{ g}\cdot\text{cm}^{-3}$ ,  $a = 10.8801(12)$ ,  $b = 12.8327(14)$ ,  $c = 13.3727(14) \text{ \AA}$ ,  $\beta = 93.490(4)^\circ$ ,  $V = 1863.6(3) \text{ \AA}^3$ , 22303 observed and 3827 [ $I > 2\sigma(I)$ ], 3832 [all data] independent reflections, 278 parameters, final  $R_1 = 0.0350$ ,  $wR_2 = 0.0874$ ,  $S = 1.039$  [ $I > 2\sigma(I)$ ] and  $R_1 = 0.0350$ ,  $wR_2 = 0.0874$ ,  $S = 1.039$  [all data]. CCDC 2267702.

All non-hydrogen atoms were refined anisotropically. The O-H hydrogen atoms were assigned from the difference Fourier map and refined isotropically. Another hydrogen atoms were refined isotropically on the calculated positions using a riding model (AFIX 13, 23 and 43) with  $U_{\text{iso}}$  values constrained to  $1.2 U_{\text{eq}}$  of their parent atoms.

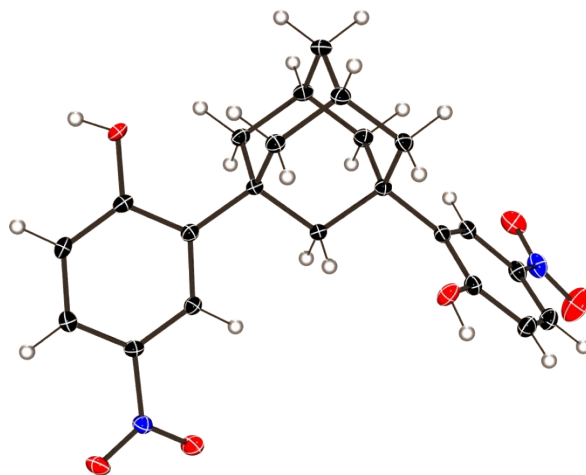

**Fig. S4** ORTEP drawing of **1** in crystal **1d** (50% probability).

### Single crystal X-ray diffraction experiment for crystal 2a

The yellow prismatic crystal ( $0.100 \times 0.100 \times 0.080 \text{ mm}^3$ ) was obtained from slow evaporation of an acetone solution of **2**.

$\text{C}_{22}\text{H}_{22}\text{N}_2\text{O}_6$ ,  $M_r = 410.41$ ; orthorhombic, space group  $Cmcm$ ,  $Z = 4$ ,  $D_{\text{calc}} = 1.489 \text{ g}\cdot\text{cm}^{-3}$ ,  $a = 6.6173(6)$ ,  $b = 13.6049(11)$ ,  $c = 20.3294(17) \text{ \AA}$ ,  $V = 1830.2(3) \text{ \AA}^3$ , 11088 observed and 1028 [ $I > 2\sigma(I)$ ], 1079 [all data] independent reflections, 92 parameters, final  $R_1 = 0.0389$ ,  $wR_2 = 0.1129$ ,  $S = 1.101$  [ $I > 2\sigma(I)$ ] and  $R_1 = 0.0403$ ,  $wR_2 = 0.1149$ ,  $S = 1.101$  [all data]. CCDC 2267703.

All non-hydrogen atoms were refined anisotropically. The O-H hydrogen atom was assigned from the difference Fourier map and refined isotropically. Another hydrogen atoms were refined isotropically on the calculated positions using a riding model (AFIX 13, 23 and 43) with  $U_{\text{iso}}$  values constrained to  $1.2 U_{\text{eq}}$  of their parent atoms.

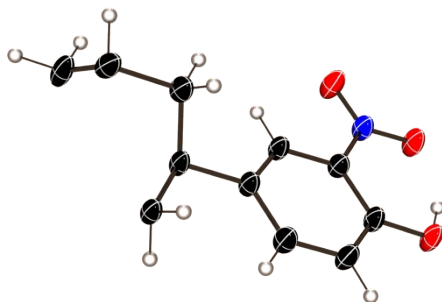

**Fig. S5** ORTEP drawing of **2** in crystal **2a** (asymmetric unit, 50% probability).

### Single crystal X-ray diffraction experiment for crystal 3a

The colourless prismatic crystal ( $0.140 \times 0.100 \times 0.080 \text{ mm}^3$ ) was obtained from slow evaporation of an acetone solution of **3**.

$\text{C}_{26}\text{H}_{30}\text{N}_2\text{O}_6$ ,  $M_r = 466.52$ ; triclinic, space group  $P-1$ ,  $Z = 2$ ,  $D_{\text{calc}} = 1.356 \text{ g}\cdot\text{cm}^{-3}$ ,  $a = 7.1643(12)$ ,  $b = 9.8755(16)$ ,  $c = 17.073(3) \text{ \AA}$ ,  $\alpha = 84.131(5)$ ,  $\beta = 85.474(5)$ ,  $\gamma = 72.254(5)^\circ$ ,  $V = 1142.9(3) \text{ \AA}^3$ , 16106 observed and 4225 [ $I > 2\sigma(I)$ ], 4521 [all data] independent reflections, 309 parameters, final  $R_1 = 0.0342$ ,  $wR_2 = 0.0905$ ,  $S = 1.055$  [ $I > 2\sigma(I)$ ] and  $R_1 = 0.0362$ ,  $wR_2 = 0.0920$ ,  $S = 1.055$  [all data]. CCDC 2267704.

All non-hydrogen atoms were refined anisotropically. Hydrogen atoms were refined isotropically on the calculated positions using a riding model (AFIX 13, 137, 23 and 43) with  $U_{\text{iso}}$  values constrained to 1.2/1.5  $U_{\text{eq}}$  of their parent atoms.

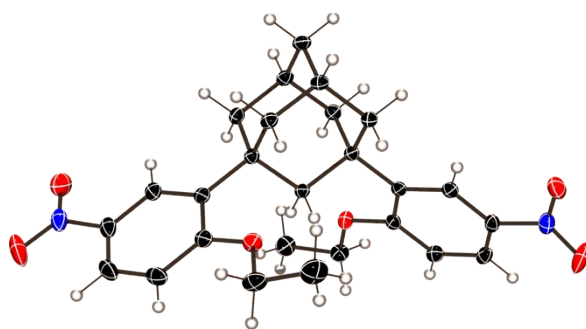

Fig. S6 ORTEP drawing of **3** in crystal **3a** (50% probability).



## References

- (1) G. M. Sheldrick, *SADABS*. University of Göttingen, Germany, 1996.
- (2) G. M. Sheldrick, *Acta Crystallogr., Sect. A: Found. Adv.*, 2015, **71**, 3–8.
- (3) G. M. Sheldrick, *Acta Crystallogr., Sect. C: Struct. Chem.*, 2015, **71**, 3–8.
